# Supplementary material
Source: PubMed Central journal article supplement (PMC10615883)
Supplement: NIHMS1932565-supplement-Supinfo.pdf [file NIHMS1932565-supplement-Supinfo.pdf]

---

## Supplemental Information

# A Photolabile Curcumin-Diazirine Analogue Enables Phototherapy with Physically and Molecularly Produced Light for Alzheimer's Disease Treatment

Shi Kuang,<sup>[a]</sup> Biyue Zhu,<sup>[a]</sup> Jing Zhang,<sup>[a]</sup> Fan Yang,<sup>[a]</sup> Bo Wu,<sup>[a]</sup> Weihua Ding,<sup>[b]</sup> Liuyue Yang,<sup>[b]</sup> Shiqian Shen,<sup>[b]</sup> Seven H Liang,<sup>[c]</sup> Prasenjit Mondal,<sup>[d]</sup> Mohanraja Kumar,<sup>[e]</sup> Rudolph E. Tanzi,<sup>[d]</sup> Can Zhang,<sup>[d]</sup> Hui Chao,<sup>\*[f]</sup> and Chongzhao Ran<sup>\*[a]</sup>

<sup>a</sup> Athinoula A. Martinos Center for Biomedical Imaging, Department of Radiology, Massachusetts General Hospital/Harvard Medical School, Room 2301, Building 149, Charlestown, Boston, Massachusetts 02129; <sup>b</sup>MGH Center for Translational Pain Research, Department of Anesthesia, Critical Care and Pain Medicine, Massachusetts General Hospital, Harvard Medical School, Boston, MA 02114. <sup>c</sup> Department of Radiology, Massachusetts General Hospital, Harvard Medical School, Boston, MA 02114 (USA). <sup>d</sup>Genetics and Aging Research Unit, McCance Center for Brain Health, MassGeneral Institute for Neurodegenerative Disease, Department of Neurology, Massachusetts General Hospital, Harvard Medical School Boston, MA 02129 (USA). <sup>e</sup>Department of Chemistry, Massachusetts Institute of Technology, MA, Cambridge, 02139. <sup>f</sup>MOE Key Laboratory of Bioinorganic and Synthetic Chemistry, School of Chemistry, Sun Yat-Sen University, Guangzhou, 510006, P. R. China

---

## TABLE OF CONTENTS

|                                                                                                                |    |
|----------------------------------------------------------------------------------------------------------------|----|
| <b>Experimental Section</b> .....                                                                              | 3  |
| Materials and Measurements                                                                                     | 3  |
| Synthesis and Characterization                                                                                 | 3  |
| Binding affinity $K_d$ measurement and binding kinetics                                                        | 4  |
| Photoreaction of CRANAD-147                                                                                    | 4  |
| Seeding experiments with different $A\beta_{40}$ aggregates                                                    | 4  |
| Protease K digest experiments                                                                                  | 5  |
| SDS-PAGE gel electrophoresis                                                                                   | 5  |
| MALDI-TOF                                                                                                      | 5  |
| Molecular light for CRET between ADLumin-4 and CRANAD-147                                                      | 5  |
| Cell toxicity/viability measurement                                                                            | 5  |
| 3D organoids cell culture                                                                                      | 5  |
| <i>In vivo</i> therapeutic studies                                                                             | 5  |
| Ethics Statement                                                                                               | 5  |
| <b>Supporting Figures</b> .....                                                                                | 6  |
| Figure S1. HPLC of CRANAD-147 before and after irradiation                                                     | 6  |
| Figure S2. MS of CRANAD-147 after irradiation                                                                  | 6  |
| Figure S3. Binding constant $K_d$ measurement of CRANAD-147 with $A\beta$ aggregates                           | 7  |
| Figure S4. FL spectra of Thioflavin T after irradiation                                                        | 7  |
| Figure S5. FL spectra of CRANAD-147 after LED irradiation and after adding fresh CRANAD-147 for rescuing study | 8  |
| Figure S6. FL spectra of CRANAD-147 and $A\beta_{40}$ aggregates with catechol                                 | 8  |
| Figure S7. Western blot of $A\beta_{40}$ aggregates with different treatments                                  | 9  |
| Figure S8. SDS-Page gel of $A\beta_{40}$ aggregates with CRANAD-147 under LED irradiation                      | 9  |
| Figure S9. LC-MS spectra of $A\beta_{40}$ after different treatments.                                          | 10 |
| Figure S10. Zoomed -in MS spectra of $A\beta$ species for the group of $A\beta_{40}$ /CRANAD-147/LED.          | 10 |
| Figure S11. MALDI-TOF MS of $A\beta_{40}$ after LED irradiation but without CRANAD-147.                        | 11 |
| Figure S12. LC-MS of $A\beta$ fragments from trypsinization treatment                                          | 11 |
| Figure S13. MALDI-TOF MS of $A\beta$ fragments from trypsinization treatment                                   | 12 |
| Figure S14. Luminescent spectrum of ADLumin-4                                                                  | 12 |
| Figure S15. UV-Vis spectra of ADPA for singlet oxygen trapping                                                 | 13 |
| Figure S16. <i>In vitro</i> mimic experiment                                                                   | 13 |
| Figure S17. Time dependent quantitative analysis of CRET effect <i>in vivo</i>                                 | 14 |
| Figure S18. $^1H$ NMR spectrum of CRANAD-147 in $CDCl_3$                                                       | 14 |
| Figure S19. $^{13}C$ NMR spectrum of CRANAD-147 in $CDCl_3$                                                    | 15 |
| Figure S20. $^1H$ NMR spectrum of ADLumin-4 in $CD_3OD$                                                        | 15 |
| Figure S21. $^{13}C$ NMR spectrum of ADLumin-4 in $CD_3OD$                                                     | 16 |
| <b>References</b> .....                                                                                        | 16 |

## Experimental Section

### Materials and Measurements

All reagents were purchased from Sigma-Aldrich, of reagent grade quality, and were used as received unless stated otherwise. Column chromatography was performed on a glass column slurry-packed with silica gel (60 Å, 40–63 mm; SiliCycle Inc.). Recombinant A $\beta$  peptide (1-40) was purchased from rPeptide. A $\beta$  aggregates for *in vitro* studies were generated by a slow stirring of A $\beta$ <sub>40</sub> in PBS buffer for 3 days at room temperature. <sup>1</sup>H and <sup>13</sup>C NMR spectra were recorded at 500 MHz and 125 MHz on JOEL spectrometers in CDCl<sub>3</sub> solution at room temperature. Liquid chromatography-mass spectrometry (LC-MS) was performed using an Agilent 1200 Series apparatus with an LC/MSD trap and Daly conversion dynode detector with UV detection at 254 nm. Fluorescence measurements were carried out using an F-7100 fluorescence spectrophotometer (Hitachi). The IVIS Spectrum imaging system (PerkinElmer) was used for *in vitro* and *in vivo* imaging.

### Synthesis and characterization

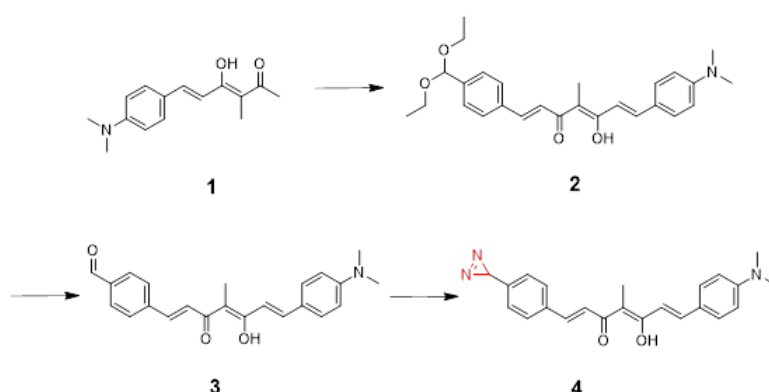

**Scheme S1.** Synthesis of the CRANAD-147.

**Synthesis of 6-(4-(dimethylamino)phenyl)-4-hydroxy-3-methylhexa-3,5-dien-2-one (1):** B<sub>2</sub>O<sub>3</sub> (0.7g, 10 mmol) was added into a solution of DMF (8 mL), and the resulting mixture was heated to 120 °C for 30 min until dissolved. To the above mixture, 3-methylpentane-2,4-dione (1.14g, 10 mmol) was added drop-wise. After that, the heating temperature for the mixture was decreased to 110 °C, which was followed by an addition of tributyl borate (4.6 g, 20 mmol). The resulting mixture was stirred for an additional 5 min at 110 °C, followed by an addition of 4-(dimethylamino)benzaldehyde (1.5 g, 10 mmol). The resulting solution was stirred for 5 min, followed by the addition of a solution of 1,2,3,4-tetrahydroquinoline (0.2 mL) and acetic acid (0.4 mL) in DMF (5 mL). The reaction mixture was stirred at 110 °C for 2 h. Upon completion, after cooling to room temperature, the mixture was poured into 400g ice. The resulting solution was filtered and washed with cold water. The precipitate was collected, and the crude product was further purified by flash silica chromatography (HEX: EA=2:1). **Compound 1** was obtained as an orange solid with a 25 % yield. <sup>1</sup>H NMR (500 MHz, CDCl<sub>3</sub>):  $\delta$  7.60 (d, J = 15.4 Hz, 1H), 7.45 (d, J = 8.9 Hz, 2H), 6.72 (d, J = 15.4 Hz, 1H), 6.67 (d, J = 8.8 Hz, 2H), 3.01 (s, 6H), 2.21 (s, 3H), 1.99 (s, 3H).

**Synthesis of 1-(4-(diethoxymethyl)phenyl)-7-(4-(dimethylamino)phenyl)-5-hydroxy-4-methylhepta-1,4,6-trien-3-one (2):** Compound 1 (200 mg, 0.8 mmol) was dissolved in 10 mL butanol, followed by addition of 4-(diethoxymethyl)benzaldehyde (155  $\mu$ L, 1 eq) and piperidine (120  $\mu$ L, 1.5 eq). The resulting mixture was refluxed for 24 h. After cooling to room temperature, the solvent was removed under reduced pressure, and the residue was washed with water and extracted by ethyl acetate. After removing the solvent under reduced pressure, the crude products were obtained and used for the next step without further purification.

**Synthesis of 4-(7-(4-(dimethylamino)phenyl)-5-hydroxy-4-methyl-3-oxohepta-1,4,6-trien-1-yl)benzaldehyde (3):** Compound 2 was dissolved with 10 mL dd water and 10 mL CH<sub>3</sub>OH. The resulting solution was refluxed for 2 h. After cooling to room temperature, the solvent was removed under the reduced pressure and the residue was extracted by ethyl acetate (20 mL\*3). The organic phase was collected and then the solvent was removed under reduced pressure. The crude product was purified by flash silica chromatography (HEX: EA=2:1). **Compound 3** was obtained as a red solid with a 20 % yield.

**Synthesis of 1-(4-(3H-diazirin-3-yl)phenyl)-7-(4-(dimethylamino)phenyl)-5-hydroxy-4-methylhepta-1,4,6-trien-3-one (4) CRANAD-147:** Compound 3 (23 mg, 0.06 mmol) was added in a round flask that was covered with foil paper, followed by adding of NH<sub>3</sub>·H<sub>2</sub>O (14N, 75  $\mu$ L, 1.05 mmol, 17.5 eq) and CH<sub>3</sub>OH (75  $\mu$ L) at 0 °C. The flask was flushed with Argon gas, and the resulting mixture was stirred for 30 min at 0 °C. Then (diacetoxyiodo)benzene (50 mg, 0.15 mmol, 2.5 eq) was added into the flask that was under an inert atmosphere of Argon. The resulting solution was stirred at 0 °C for another 4 h, and the reaction mixture was slowly warmed to

room temperature overnight. Upon completion, the reaction mixture was concentrated under reduced pressure, and the residue was purified by flash silica chromatography (HEX: EA=2:1) under the dark. **Compound 4 (CRANAD-147)** was obtained as a red solid with a 28 % yield. <sup>1</sup>H NMR (500 MHz, CDCl<sub>3</sub>): δ 7.67 (d, J = 15.4 Hz), 7.62 (d, J = 15.7 Hz), 7.48 (d, J = 8.7 Hz), 7.43 (d, J = 8.8 Hz), 6.91 (d, J = 15.3 Hz), 6.73 – 6.65 (m), 6.63 (dd, J = 12.1, 3.2 Hz), 4.09 (q, J = 6.9 Hz), 3.04 (s), 3.02 (s), 2.14 (s), 1.44 (d, J = 6.9 Hz). <sup>13</sup>C NMR (126 MHz, CDCl<sub>3</sub>) δ 142.42, 138.34, 135.00, 131.74, 128.86, 128.66, 123.93, 121.01, 113.30, 45.84, 8.53. ESI-MS (m/z): 374.5 [M+H<sup>+</sup>].

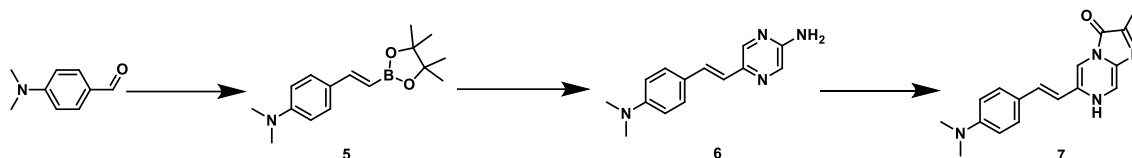

**Scheme S2.** Synthesis of the ADLumin-4.

**Synthesis of (E)-6-(4-(dimethylamino)styryl)-2-methylimidazo[1,2-a]pyrazin-3(7H)-one (7) ADLumin-4:** ADLumin-4 was obtained as an orange solid using the same method as for ADLumin-1<sup>[1]</sup>. Compound 7 (ADLumin-4) was obtained as a red solid with a 62 % yield. <sup>1</sup>H NMR (500 MHz, CD<sub>3</sub>OD): δ 9.07 (s, 1H), 8.50 (s, 1H), 7.86 (d, J = 8.1 Hz, 2H), 7.79 (d, J = 16.2 Hz, 1H), 7.73 (d, J = 7.8 Hz, 2H), 7.45 (d, J = 16.0 Hz, 1H), 3.31 (s, 6H), 2.53 (s, 1H). <sup>13</sup>C NMR (126 MHz, CD<sub>3</sub>OD): δ 142.42, 138.34, 135.00, 131.74, 128.86, 128.66, 123.93, 121.01, 113.30, 45.84, 8.53. ESI-MS (m/z): 295.4 [M+H<sup>+</sup>].

**Binding affinity K<sub>d</sub> measurement and binding kinetics:** For binding affinity K<sub>d</sub>: to a solution of CRANAD-147 (1.0 μM) in PBS, different concentrations of Aβ<sub>40</sub> aggregates were added, and the fluorescence intensity was recorded until the intensity was not changed. The recorded peak values were fitted by GraphPad with the one-site binding model to provide binding affinity K<sub>d</sub>. For time-dependent binding kinetics, CRANAD-147 (1.0 μM) and Aβ<sub>40</sub> (500 nm) were mixed in the PBS and the fluorescence emission intensity was recorded every 1 min. for 60 minutes.

**Photoreaction of CRANAD-147:** To a solution of CRANAD-147 (500 nM) in PBS, 250 nM (0.5 eq), 500 nM (1 eq), 1.0 μM (2 eq), 2.5 μM (5 eq) Aβ<sub>40</sub> aggregates were added and incubated for 1 h. The resulting solution was then irradiated by 470 nm LED light (4 mW/cm<sup>2</sup>, 30 s), and the fluorescence intensity was recorded every 30 s. After that, the data were recorded and fitted by GraphPad software. After the experiments, the samples were kept in the dark overnight. For rescue experiments, different concentrations of fresh AD-147 were added to the above samples, and the emission intensity was recorded again. To check whether the emission intensity of the above samples changes after irradiating by the 470 nm again (4 mW/cm<sup>2</sup>, 30 s), the emission intensity was recorded again after the addition of fresh solutions of CRANAD-147. For the photoreaction experiments, Thioflavin T (ThT) was used as a control probe that is not photosensitive.

**Seeding experiments with different Aβ<sub>40</sub> aggregates:** The Aβ<sub>40</sub> aggregates (300 μL, 25 μM) were treated as following:

Group 1: The Aβ<sub>40</sub> aggregates were kept in a dark environment;

Group 2: The Aβ<sub>40</sub> aggregates were irradiated by 470 nm LED light (4 mW/cm<sup>2</sup>, 60 s);

Group 3: The Aβ<sub>40</sub> aggregates were mixed with CRANAD-147 (1 eq), and the resulting mixture was kept in the dark environment;

Group 4: The Aβ<sub>40</sub> aggregates were mixed with CRANAD-147 (1 eq) and then incubated for 1 h. Then the resulting mixture was irradiated by 470 nm LED light (4 mW/cm<sup>2</sup>, 60 s);

Group 5: The PBS group had no seeds of Aβ<sub>40</sub> aggregates.

After the treatments, all these samples were added to a solution of Aβ<sub>40</sub> monomers (6 mL, 25 μM) separately. In every time-point, a 500 μL sample was pipetted out, followed by the addition of ThT (500 nM). Then the emission intensity was recorded at 495 nm (Ex = 435 nm). The emission intensities were recorded twice daily until no significant intensity change could be observed. The emission peak intensities were normalized by the last data for each group.

**Protease K digest experiments:** Six groups of Aβ<sub>40</sub> aggregates in PBS (3.0 mL, 5 μM) were treated as below, respectively.

Group 1: The Aβ<sub>40</sub> aggregates were kept in a dark environment;

Group 2: The Aβ<sub>40</sub> aggregates were irradiated by 470 nm LED light (4 mW/cm<sup>2</sup>, 60 s);

Group 3: The Aβ<sub>40</sub> aggregates were mixed with CRANAD-147 (1 eq), and the resulting mixture was kept in the dark environment;

Group 4: The Aβ<sub>40</sub> aggregates were mixed with CRANAD-147 (1 eq) and then incubated for 1 h. Then the resulting mixture was irradiated by 470 nm LED light (4 mW/cm<sup>2</sup>, 60 s);

Group 5: The Aβ<sub>40</sub> aggregates was mixed with mixed with ADLumin-4 (10 eq);

Group 6: The Aβ<sub>40</sub> aggregates were mixed with CRANAD-147 (1 eq) and then incubated for 1 h, followed by the addition of ADLumin-4 (10 eq).

After these treatments, all these samples were incubated overnight. Then protease K (0.1 mg/mL) was added to each sample, and all of these samples were incubated at 37 °C humidity incubator. The Aβ aggregates concentrations were measured by the ThT, and the data was recorded every 30 min.

**SDS-PAGE gel electrophoresis:** The samples of A $\beta$ <sub>40</sub> aggregates were treated as same as the above six groups. The treated samples were loaded into 12-20% SDS-Page gel with a volume of 20  $\mu$ L/well. The gel was run at 200 V for 50 min. Then the gel was visualized by silver stain kit, and the image was captured by the IVIS. For the western blot experiment, the primary antibody was 6E10.

**MALDI-TOF:** The samples of A $\beta$ <sub>40</sub> aggregates were treated as same as the above six groups. Then the treated samples were diluted with the HFIP (Hexafluoro isopropanol) (5  $\mu$ M final concentration) to dissociate no-covalent binding between A $\beta$ s.

**Molecular light for CRET between ADLumin-4 and CRANAD-147:** CRANAD-147 (50  $\mu$ M) and ADLumin-4 (50  $\mu$ M) was mixed in a DMSO solution, and the chemiluminescent emission spectrum was recorded on an IVIS imaging system with filters of 20nm-band width from 500nm to 700nm. For CRET with A $\beta$ s, CRANAD-147 (25  $\mu$ M) was added to a solution of A $\beta$ <sub>40</sub> oligomers (25  $\mu$ M) in PBS buffer (pH7.4), and the resulting mixture was incubated for 1 h. Then, ADLumin-4 (25  $\mu$ M) was added to the above mixture, and the chemiluminescent emission was recorded by the IVIS imaging system.

**Cell toxicity/viability measurement:** SH-SY5Y cells were seeded in a 96-well plate and incubated for 24 h. To the cell media, different A $\beta$ s that were treated as the above groups were added. Then the cells were further incubated 48 h. Upon the completion of culture, ADP kit and ATP kit were used to measure the concentrations of ADP and ATP in the medium separately.

**3D organoids cell culture:** For the 3D brain cell spheroids: about  $4 \times 10^3$  per well SH-SY5Y cells were seeded into the 96-well spheroid bottom plate and incubated in an incubator at 37 °C for 3 days. Then the cell was treated as the above six groups respectively. The cell spheroids' diameter was recorded every two days. After two weeks of measurement, cell spheroids were dissociated and subjected to ATP assay. For 3D brain organoids: The iPS cell was obtained from Applied StemCell, Inc. (cat. No. ASE-9321K). The detailed experimental condition to prepare iPS 3D organoids was referred to the application note of neural organoid culture from gibco ([www.thermofisher.com/organoid](http://www.thermofisher.com/organoid)). Briefly, about  $10^3$  per well iPSCs were seeded into the 96-well spheroid bottom plate. The organoid culture in the presence of extracellular matrices and incubated in 37 °C incubators for 3 days. Then the organoids were subjected to a treatment of two weeks as the above six groups respectively. After the organoids were fixed and embedded in O.T.C., then the organoids were sliced into slides of 7-micron thickness. The tissue slices were stained with kits of terminal deoxynucleotidyl transferase dUTP nick end labeling (TUNEL).

**In vivo therapeutic studies:** 5xFAD mice (12 weeks, female) were randomly separated into 6 groups (n=5 per group). For *in vivo* imaging, on day 0, 5, 12, 17, 23, 28 and 32, the mice were i.p injected with ADLumin-1 (10 mg/kg, formulation: 2.0 mg/mL, 5% DMSO, 15% Castor oil and 80% saline), and chemiluminescence imaging was performed on the IVIS imaging system with an open filter at 30 minutes post the injection, and semi-quantitative imaging analysis was conducted with an average intensity of an ROI of the brain area. For therapeutic studies, the mice were treated on day 1, 3, 6, 8, 10, 13, 15, 18, 20, 22, 24, 26, and 29. After the last imaging session, all the mice were sacrificed, and the brains were extracted and frozen in -78°C freezer. For each group, the mice were independently treated as described below:

Group 1: intraperitoneal injection of vehicle of 100  $\mu$ L of the mixture of 5% DMSO, 15% Castor oil and 80% saline.

Group 2: intraperitoneal injection of vehicle of 100  $\mu$ L of the mixture of 5% DMSO, 15% Castor oil and 80% saline, 30 min later, the brain areas of the mice were exposed under the 470 nm LED light (2 mW/cm<sup>2</sup>) for 15 min.

Group 3: intraperitoneal injection of 100  $\mu$ L of a dose of 2.5 mg/Kg CRANAD-147 (Formulation: 0.5 mg/mL, 5% DMSO, 15% Castor oil and 80% saline).

Group 4: intraperitoneal injection of 100  $\mu$ L of a dose of 2.5 mg/Kg CRANAD-147 (Formulation: 0.5 mg/mL, 5% DMSO, 15% Castor oil and 80% saline), 30 min later, the mice head were exposed under the 470 nm LED light (2 mW/cm<sup>2</sup>) for 15 min.

Group 5: intraperitoneal injection of 100  $\mu$ L of a dose of 10 mg/Kg ADLumin-4 (Formulation: 2.0 mg/mL, 5% DMSO, 15% Castor oil and 80% saline).

Group 6: intraperitoneal injection of 100  $\mu$ L of a dose of 2.5 mg/Kg CRANAD-147 (Formulation: 0.5 mg/mL, 5% DMSO, 15% Castor oil and 80% physiological saline), 30 min later, the mice were intraperitoneal injected (i.p.) of 100  $\mu$ L of a dose of 10 mg/Kg ADLumin-4 (Formulation: 2.0 mg/mL, 5% DMSO, 15% Castor oil and 80% saline).

**Ethics Statement:** All experimental protocols have been reviewed and approved by the Institutional Animal Care and Use Committee (IACUC) at Massachusetts General Hospital. (Approval No.: 2011N000161).

## Supporting Figures

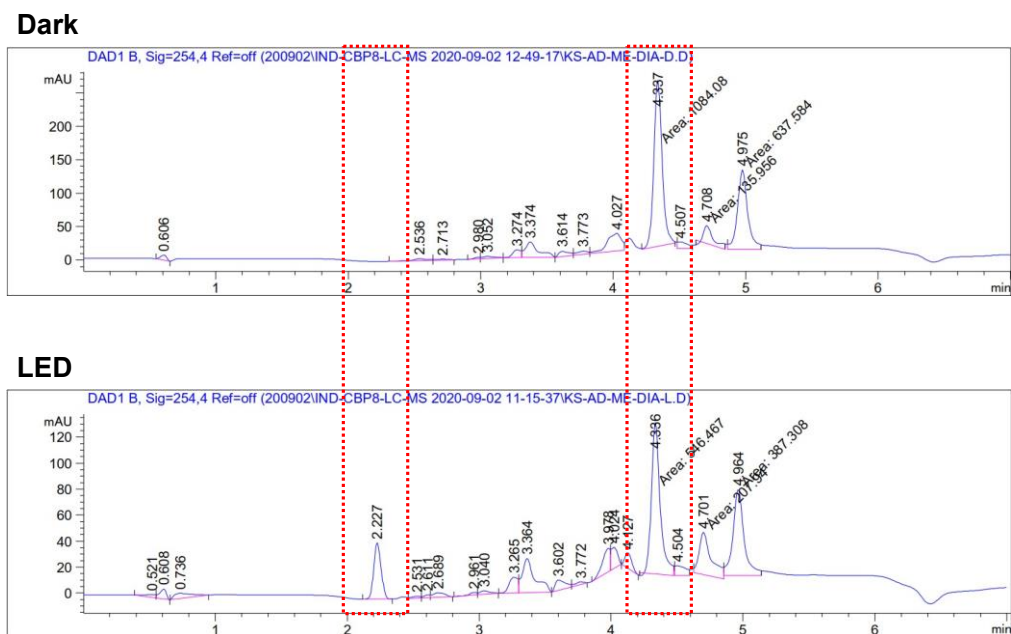

**Figure S1.** HPLC of CRANAD-147 before (upper) and after (bottom) LED-irradiation.

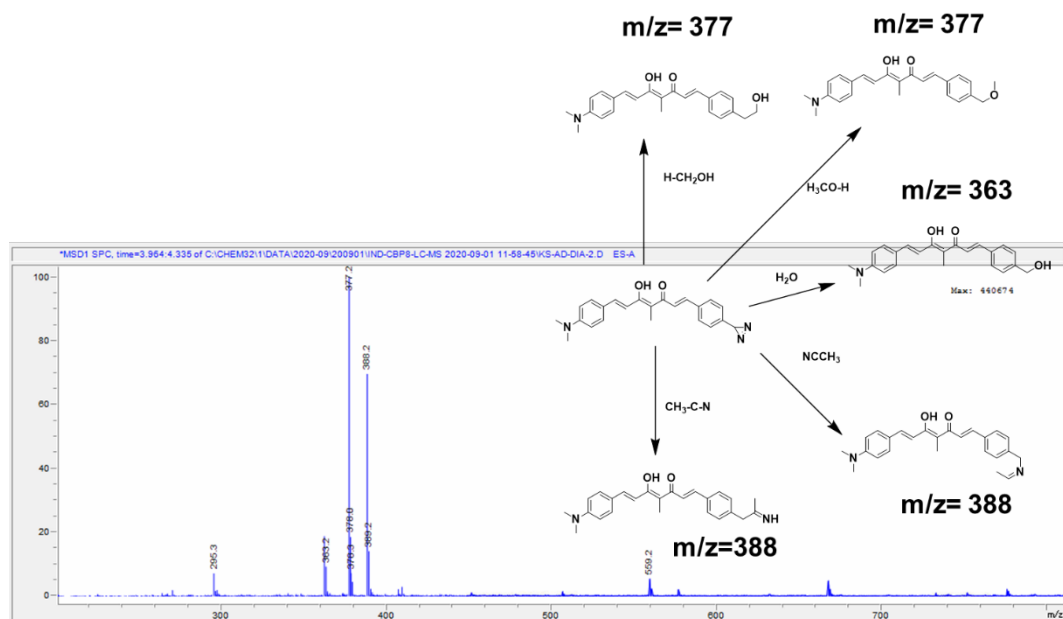

**Figure S2.** MS of CRANAD-147 after LED irradiation

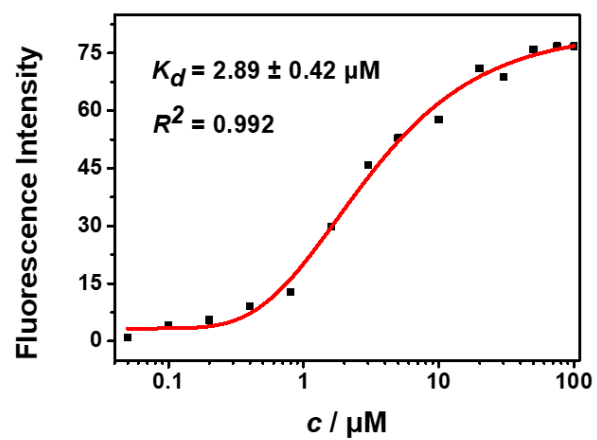

**Figure S3.** Binding constant  $K_d$  measurement of CRANAD-147 with  $A\beta$  aggregates.

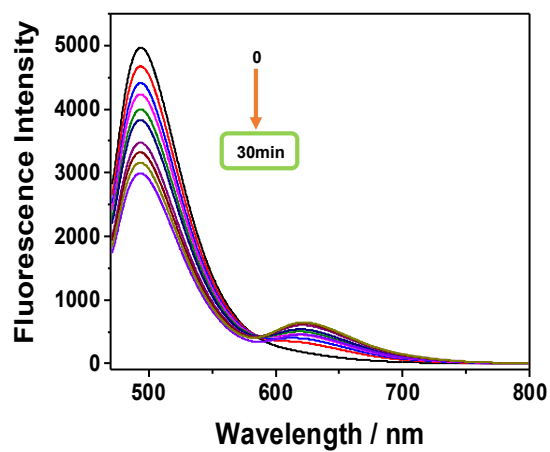

**Figure S4.** Fluorescence emission spectra of Thioflavin T after LED irradiation at different time points.

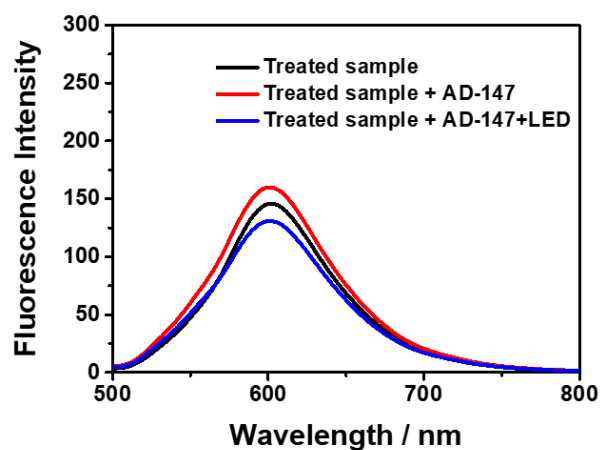

**Figure S5.** Fluorescence spectra of CRANAD-147 after LED irradiation and after adding fresh CRANAD-147 for rescuing study.

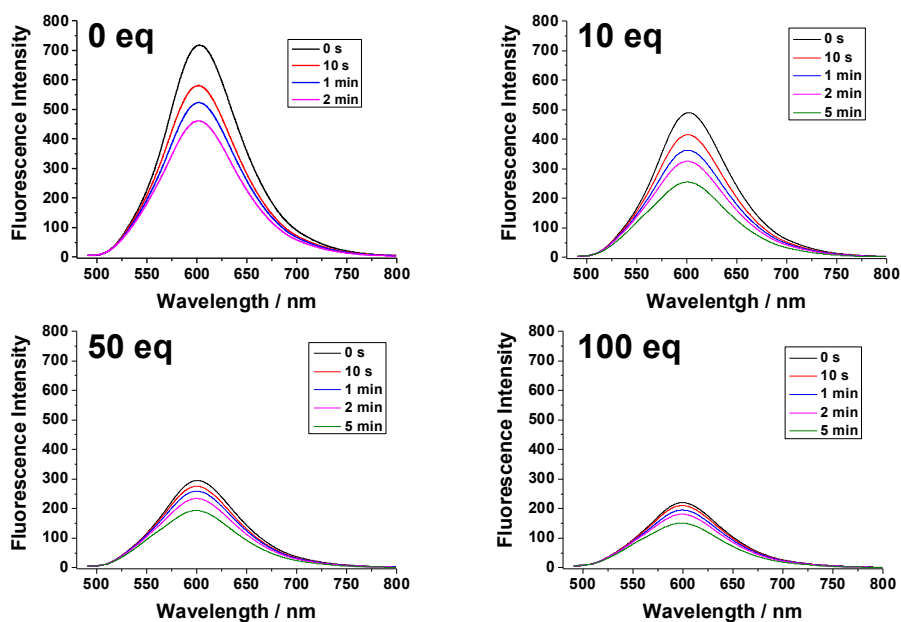

**Figure S6.** Fluorescence emission spectra of CRANAD-147 and  $A\beta_{40}$  aggregates with different concentrations of catechol at different time points after LED irradiation.



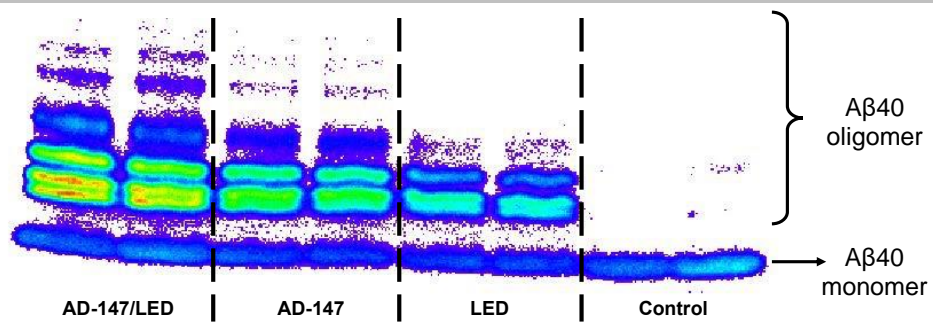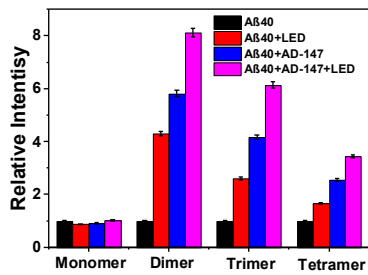

**Figure S7.** Western blot of A $\beta_{40}$  aggregates with different treatments (upper) and quantitative analysis of the bands (bottom).

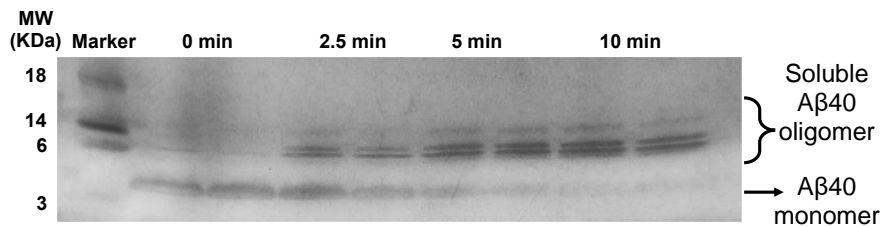

**Figure S8.** SDS-Page gel of A $\beta_{40}$  aggregates with CRANAD-147 under LED irradiation of different durations. The gel was visualized by silver staining.

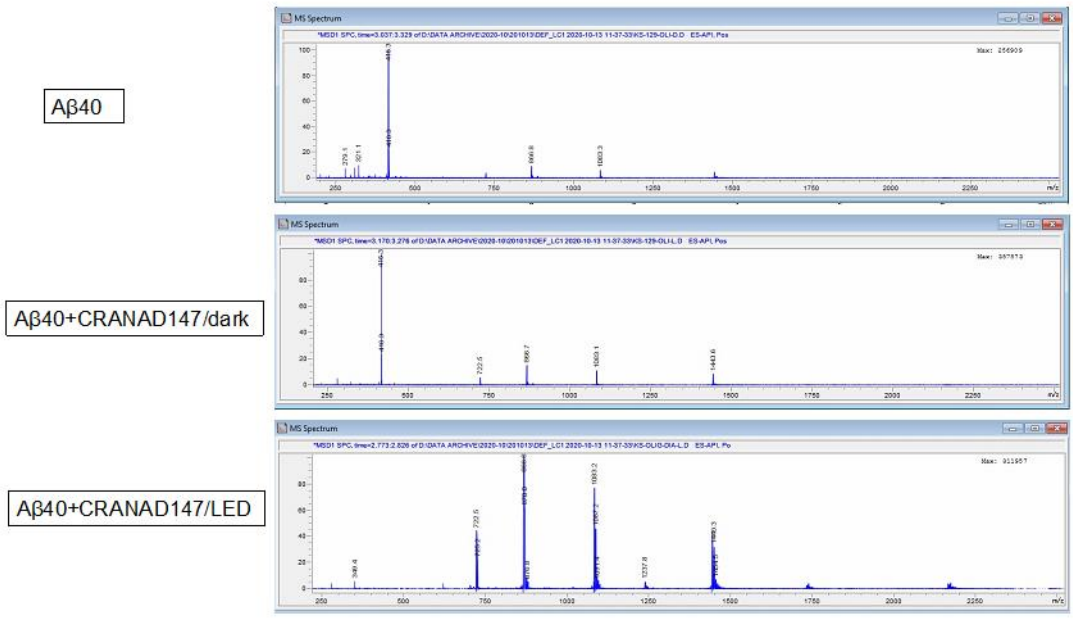

**Figure S9.** LC-MS spectra of  $A\beta_{40}$  after different treatments. Several clusters of m/z could be seen in the group of  $A\beta_{40}$ /CRANAD-147/LED.

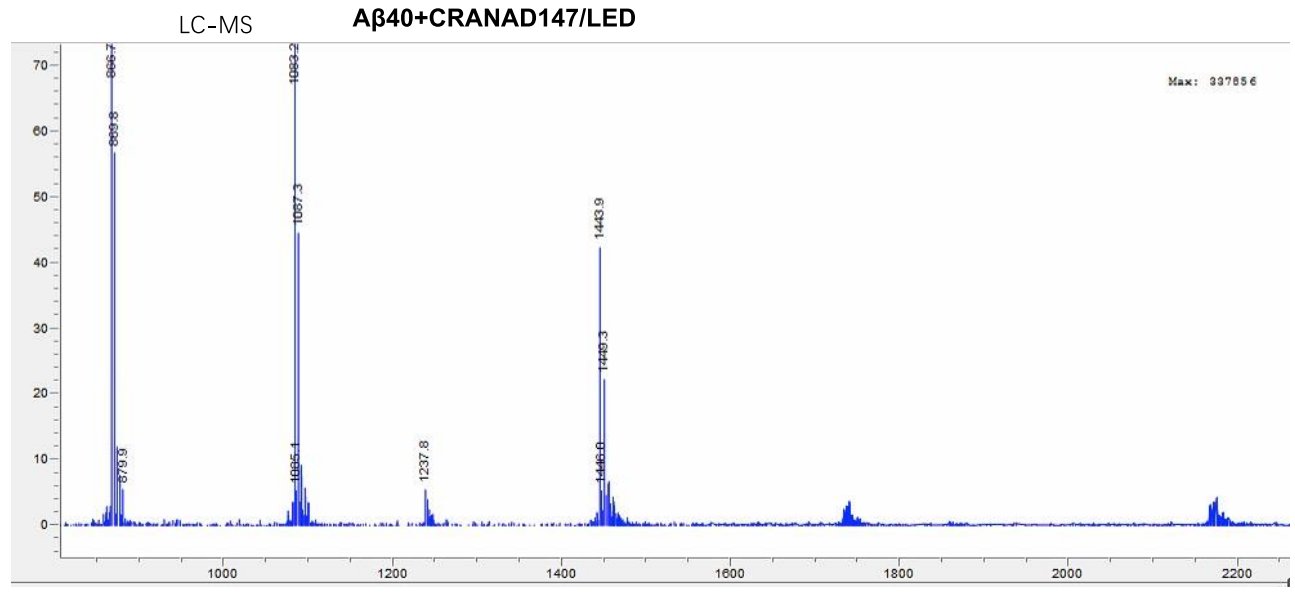

**Figure S10.** Zoomed-in MS spectra of  $A\beta$  species for the group of  $A\beta_{40}$ /CRANAD-147/LED. Several clusters can be clearly seen.

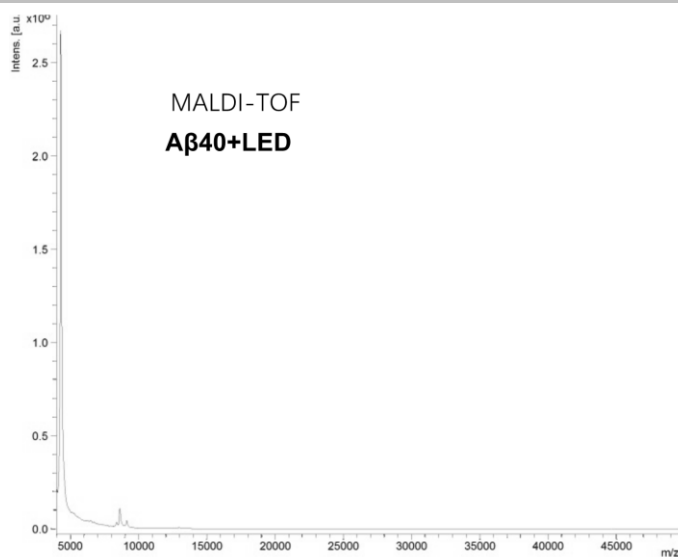

**Figure S11.** MALDI-TOF MS of  $A\beta_{40}$  after LED irradiation but without CRANAD-147.

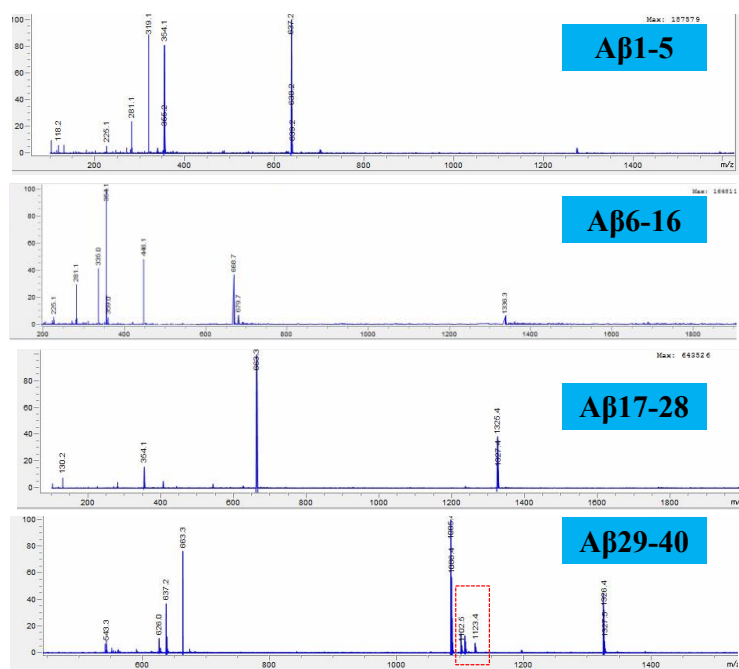

**Figure S12.** LC-MS of  $A\beta$  fragments from trypsinization treatment of the mixture of  $A\beta_{40}$ /CRANAD-147 and LED irradiation.

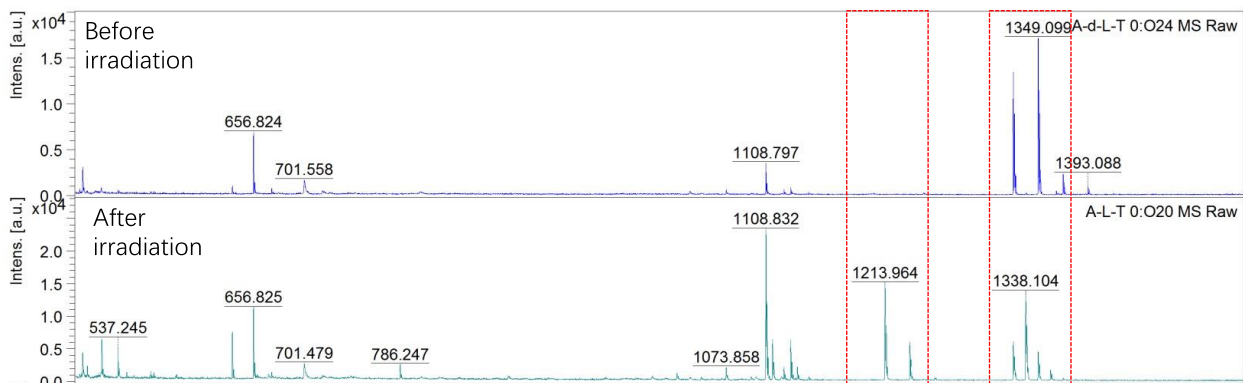

**Figure S13.** MALDI-TOF MS of Aβ fragments from trypsinization treatment of the mixture of Aβ<sub>40</sub>/CRANAD-147 and LED irradiation.

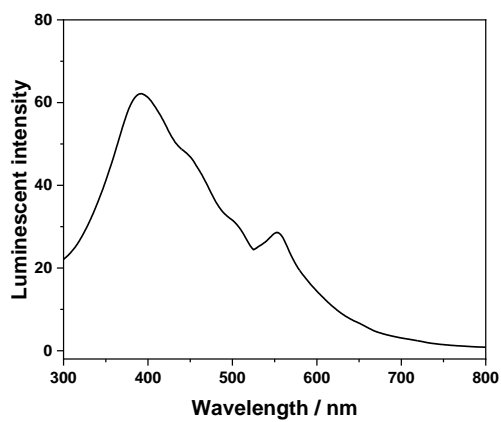

**Figure S14.** Luminescent spectrum of ADLumin-4 (25 μM) after incubation with Aβ aggregates (25 μM).

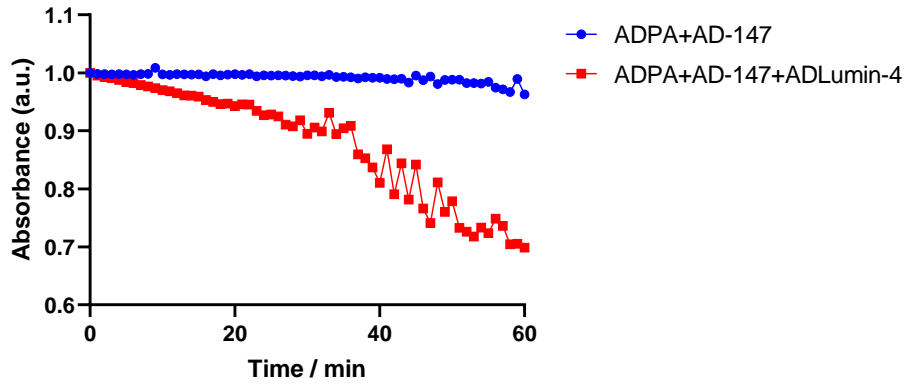

**Figure S15.** UV-Vis spectra of ADPA after being treated with CRANAD-147 or the mixture of CRANAD-147 and ADLumin-4 for different time durations.

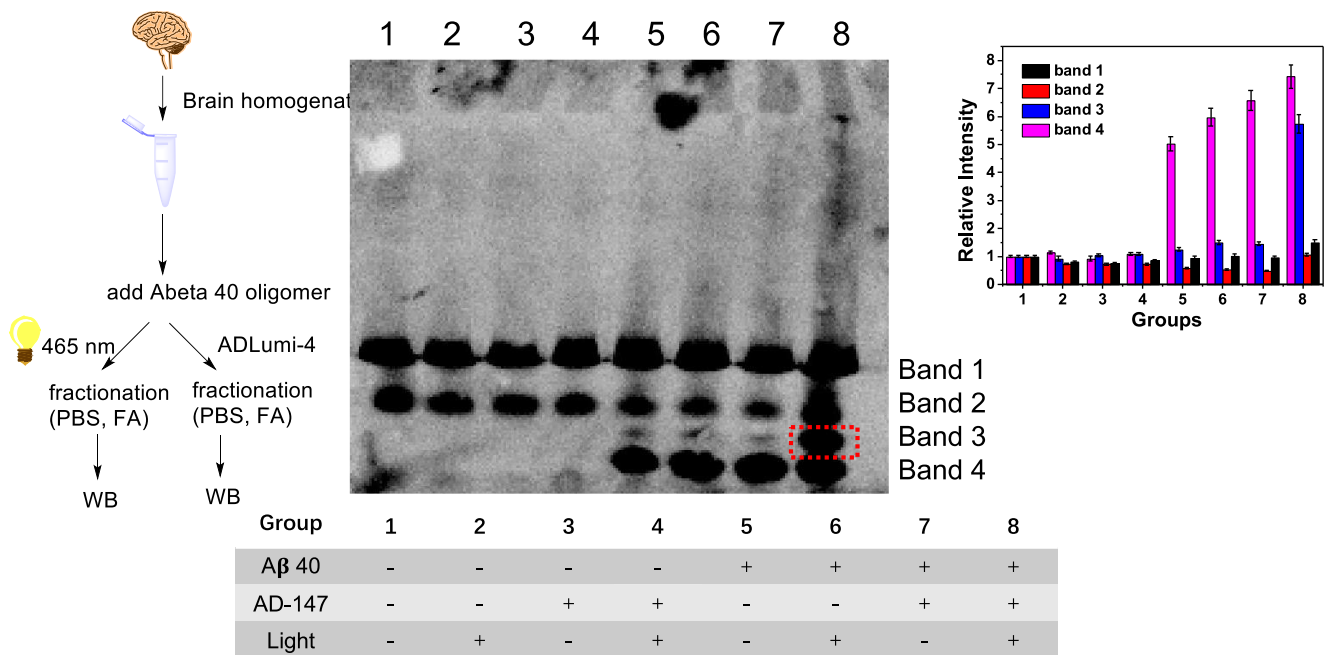

**Figure S16.** *In vitro* mimic experiment with externally added Aβ<sub>40</sub> aggregates that were treated with CRANAD-147/LED or other conditions. Western blot showed a new band (No. 3) that was absent from groups without Aβ<sub>40</sub> addition.

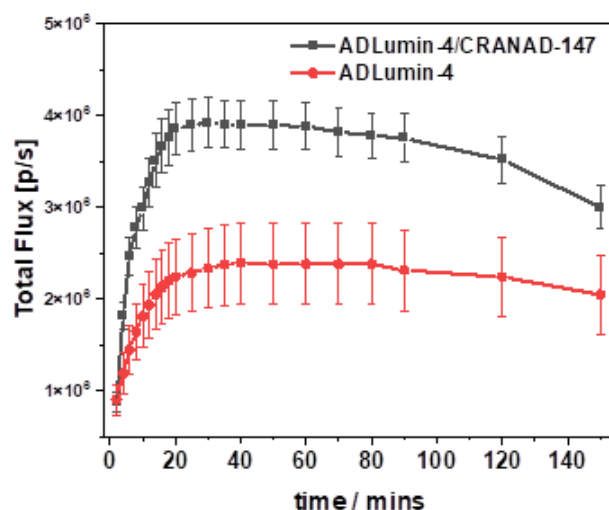

**Figure S17.** Time-dependent quantitative analysis of chemiluminescence intensity of images captured from 2 min to 150 min after i.p injection of ADLumin-4 (2.5 mg/Kg) only and the mixture of ADLumin-4 (2.5 mg/Kg) and CRANAD-147 (10.0 mg/Kg) (the CRET pair). There are significant differences between the two groups,  $n=5$ ,  $*** P < 0.001$ . The higher signals from the CRET pair group are due to the better tissue penetration from CRANAD-147 upon CRETing. The results indicate the stable co-existence of ADLumin-4/CRANAD-147 and the good stability of both compounds in vivo for over 150 minutes.

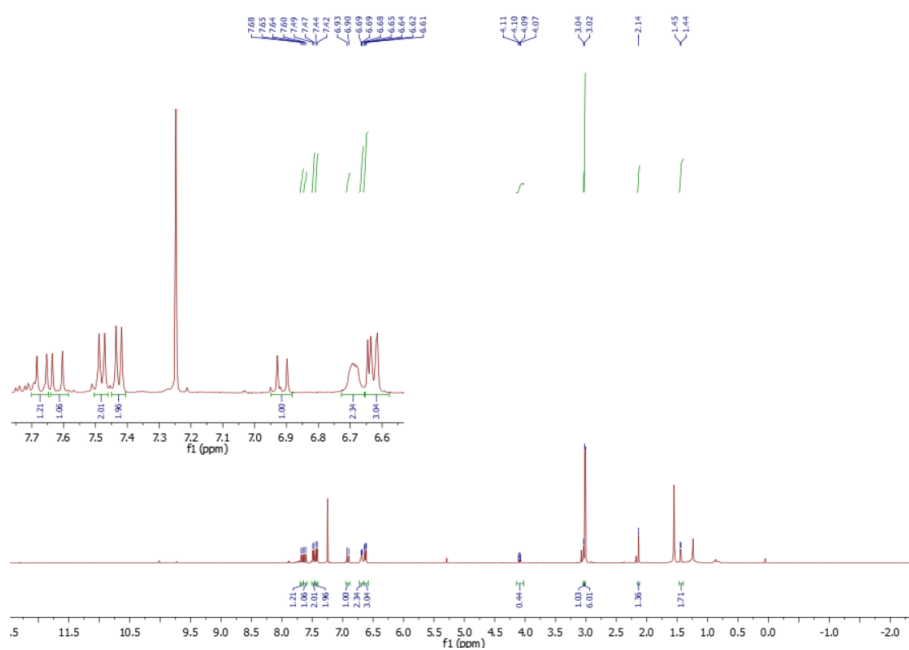

**Figure S18.** <sup>1</sup>H NMR spectrum of CRANAD-147 in CDCl<sub>3</sub>.

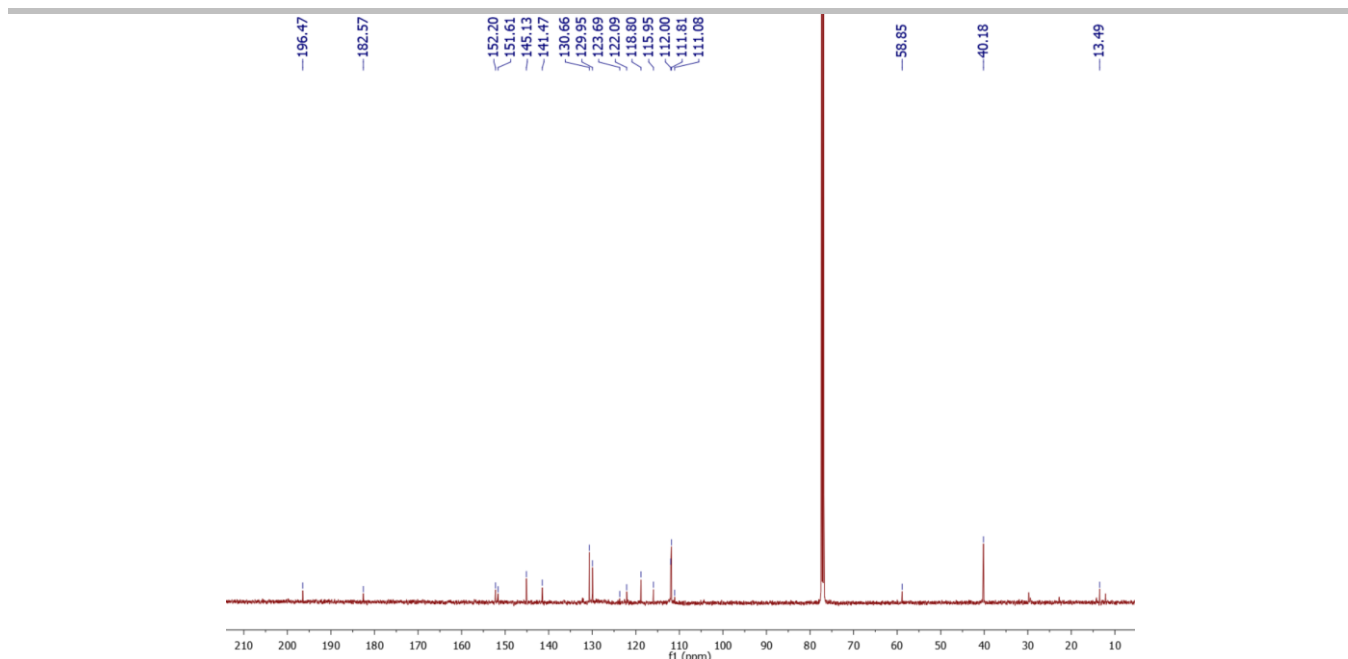

Figure S19.  $^{13}\text{C}$  NMR spectrum of CRANAD-147 in  $\text{CDCl}_3$ .

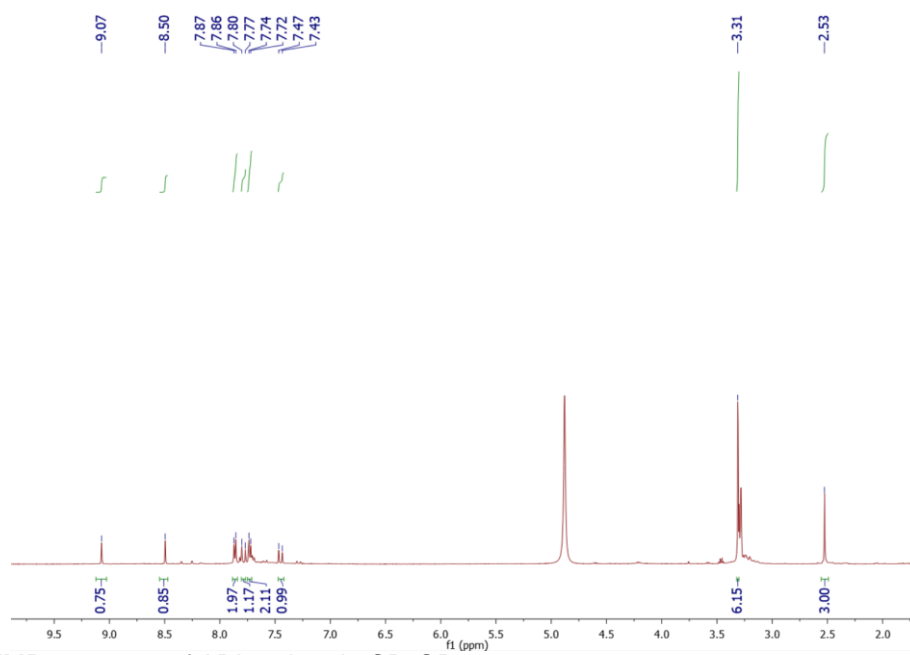

Figure S20.  $^1\text{H}$  NMR spectrum of ADLumin-4 in  $\text{CD}_3\text{OD}$ .

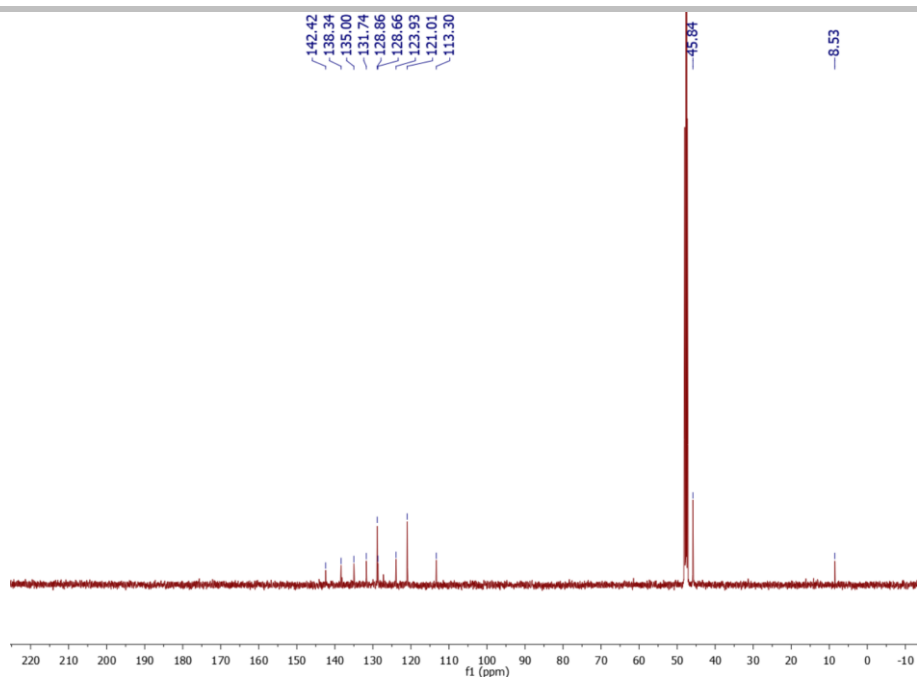

Figure S21.  $^{13}\text{C}$  NMR spectrum of ADLumin-4 in  $\text{CD}_3\text{OD}$ .

## References

- [1] J. Yang, W. Yin, R. Van, K. Yin, P. Wang, C. Zheng, B. Zhu, K. Ran, C. Zhang, M. Kumar, Y. Shao, C. Ran, *Nat. Commun.* **2020**, *11*, 4052.
